# Supplementary material for: Nanoporous nitrogen doped carbon modified graphene as electrocatalyst for oxygen reduction reaction
Source: Royal Society of Chemistry journal article supplement (doi:10.1039/c2jm31525d), 2012-01-01
Supplement: c2jm31525d.pdf [file c2jm31525d.pdf]

## Supporting Information

# Nanoporous Nitrogen Doped Carbon Modified Graphene as Electrocatalyst for Oxygen Reduction Reaction

Yiqing Sun, Chun Li, Gaoquan Shi\*

Department of Chemistry and Key Lab of Organic Phosphorus and Chemical Biology of  
Chinese Education Commission, Tsinghua University, Beijing 100084, People's Republic of  
China

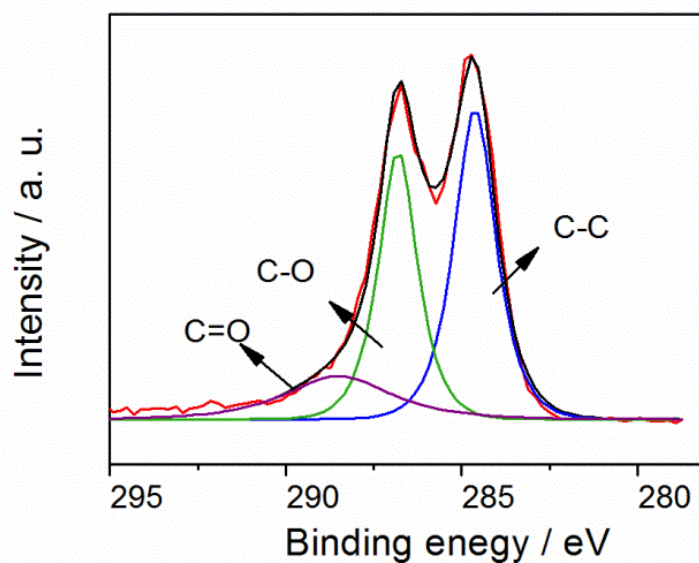

**Figure S1** C 1s XPS spectra of graphene oxide (GO). The C 1s XPS spectrum of GO shows three types of carbon atoms, C=O (288.4 eV), C-O (286.8 eV) and C=C(284.7 eV) .

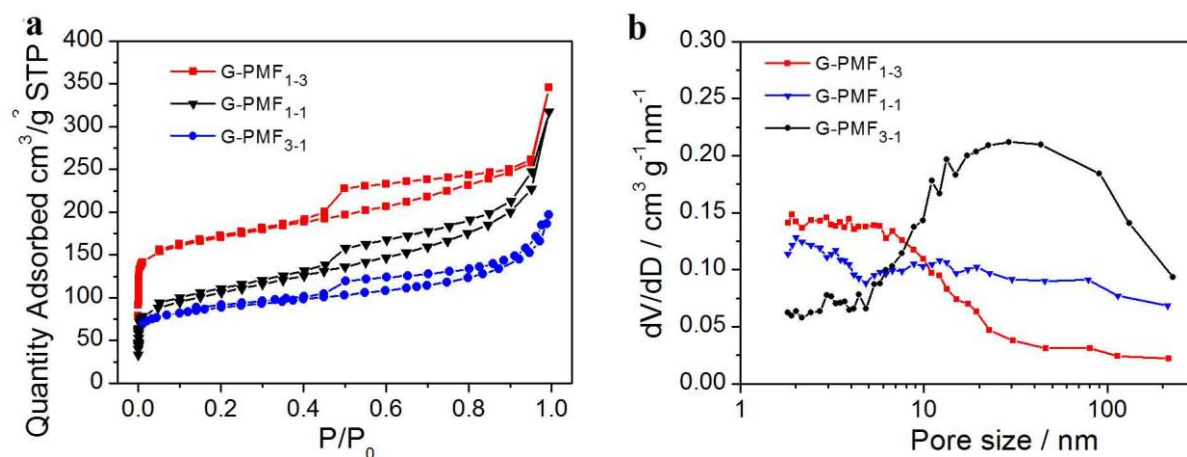

**Figure S2** (a) Nitrogen adsorption/desorption isotherms of G-PMFs. (b) The pore size distributions of G-PMFs.

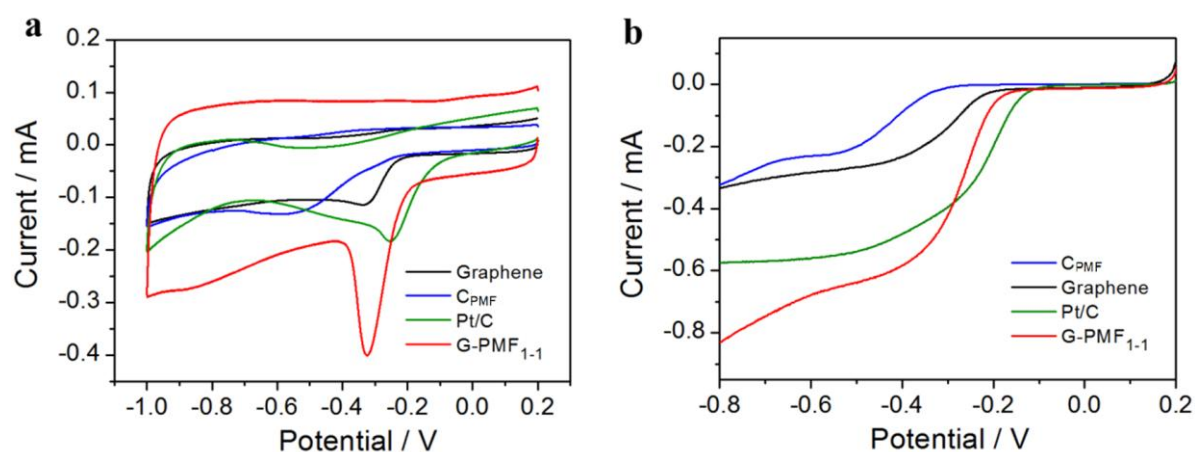

**Figure S3** (a) Typical cyclic voltammogram (CV) of graphene, C<sub>PMF</sub>, Pt/C or G-PMF<sub>1-1</sub> electrode in O<sub>2</sub> saturated 0.1 mol L<sup>-1</sup> KOH solution at a scan rate of 100 mV s<sup>-1</sup> and (b) RDE voltammogram of graphene, C<sub>PMF</sub>, Pt/C or G-PMF<sub>1-1</sub> electrode in O<sub>2</sub> saturated 0.1 mol L<sup>-1</sup> KOH solution at a scan rate of 10 mV s<sup>-1</sup> and a rotation rate of 1600 rpm.

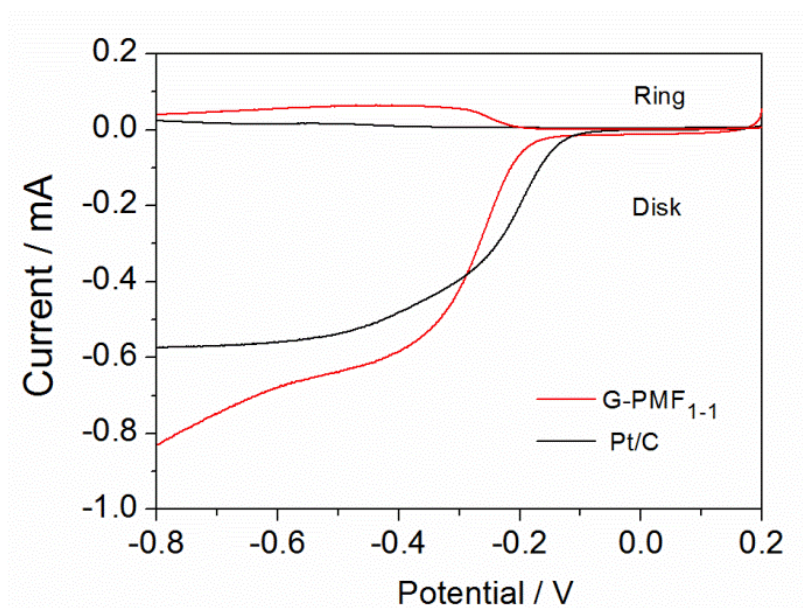

**Figure S4** Rotating ring–disk electrode (RRDE) voltammogram of G–PMF<sub>1-1</sub> or Pt/C electrode in O<sub>2</sub> saturated 0.1 M KOH at 1600 rpm. The ring electrode was polarized at 0.5 V.

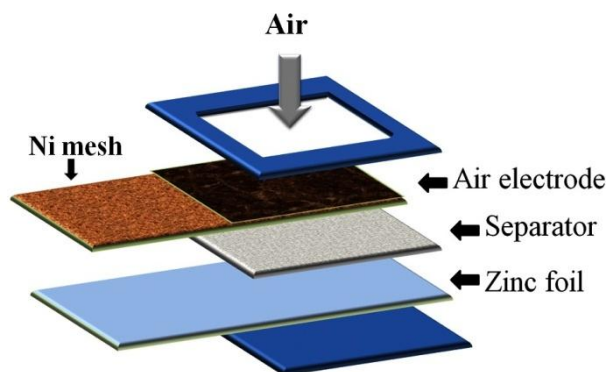

**Figure S5** The schematic illustration of a Zn–air battery.
